# Supplementary material
Source: PubMed Central journal article supplement (PMC2867419)
Supplement: 00332.2009_1.pdf [file 00332.2009_1.pdf]

1 **Supplemental Information Section for Andringa...Bailey. Analysis of the Liver Mitochondrial Proteome in Response to**  
2 **Ethanol and S-Adenosylmethionine Treatments: Novel Molecular Targets of Disease and Hepatoprotection.**

3  
4  
5 **SAM quality control.** Figure shows a representative HPLC analysis of the SAM used in these feeding studies compared to purified  
6 SAM and SAH standards. As shown, the SAM used for these feeding studies was pure and contained no contaminating levels of  
7 SAH [compare chromatogram line a (SAM alone) with line b (SAM standard + SAH standard)]. This quality control experiment is  
8 important as studies have shown that SAH sensitizes liver to TNF $\alpha$  thereby enhancing alcohol hepatotoxicity (58).  
9  
10

Figure 1.

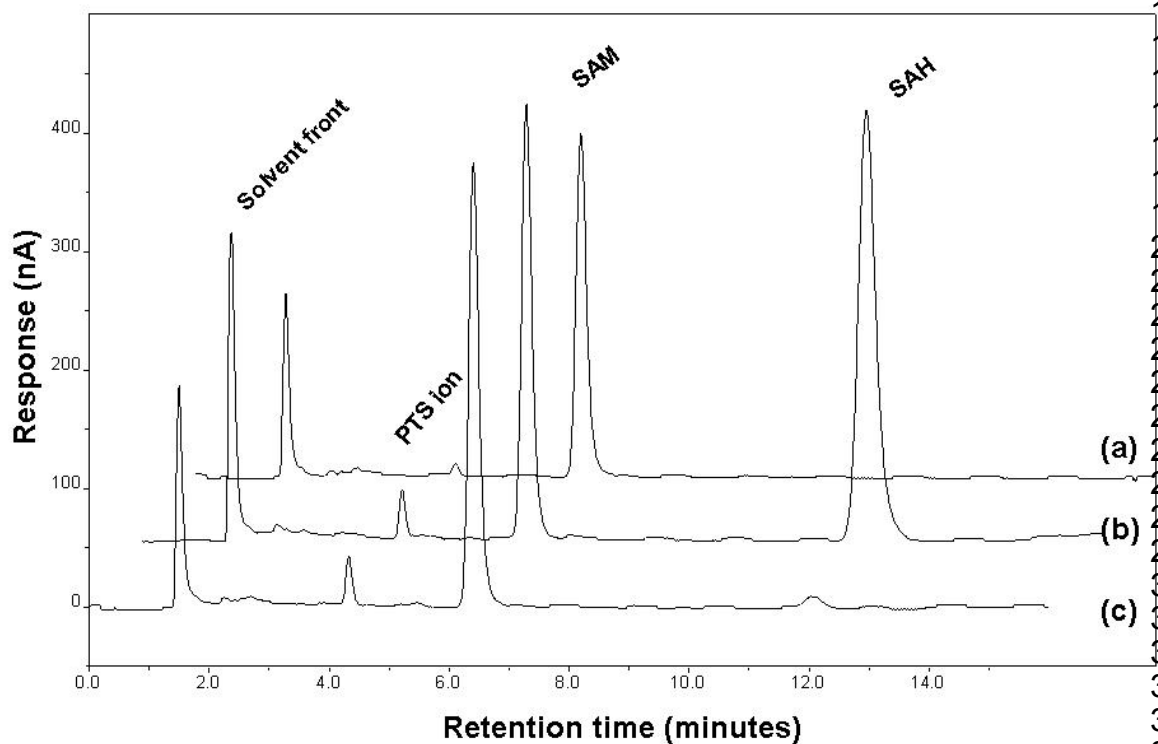

11  
12  
13  
14 **Supplement Figure 1. HPLC**  
15 **analysis of SAM.** SAM used in  
16 feeding studies and standards was  
17 prepared and analyzed as discussed  
18 in methods section. Representative  
19 chromatograms are shown with line  
20 (a) 2 nmol SAM, used in feeding  
21 studies. Line (b) is a mixture of 2  
22 nmol SAM standard and 100  $\mu$ M  
23 SAH standard and line (c) is 2 nmol  
24 SAM standard. The first peak in  
25 each chromatogram at 1.52 min  
26 shows the solvent front. The second  
27 peak in each chromatogram at 4.32  
28 min is the PTS ion (sulfate tosylate).  
29 The third peak in each  
30 chromatogram at 6.40 min is SAM.  
31 The fourth peak present in line (b) at  
32 13.07 min is SAH. These results  
33 demonstrate no contaminating SAH  
34 in SAM sample used for animal  
35 feeding studies.  
36

37 **Supplement Table 1. Supplemental table listing all matched proteins from 2D IEF/SDS-PAGE gels.**

| Spot # | Spot Designation                                                | Mass (kDa) | MOWSE Score | Matched Peptides | Accession Number |
|--------|-----------------------------------------------------------------|------------|-------------|------------------|------------------|
|        | <b>Chaperones</b>                                               |            |             |                  |                  |
| 1      | Protein disulfide isomerase/T3 binding protein                  | 54.0       | 209         | 16               | gi 202549        |
| 2      | Hspd1 protein                                                   | 60.9       | 163         | 16               | gi 1334284       |
| 3      | Heat shock 70 kDa protein 5                                     | 72.3       | 191         | 18               | gi 38303969      |
| 4      | Prohibitin                                                      | 27.7       | 106         | 10               | gi 62664759      |
| 5      | Hspd1 protein                                                   | 60.9       | 166         | 16               | gi 1334284       |
| 6      | Protein disulfide isomerase A3 precursor                        | 56.6       | 92          | 11               | gi 56905         |
| 7      | Stress-70 protein, mitochondrial (GRP75)                        | 73.8       | 107         | 12               | gi 55584140      |
| 8      | Glucose regulated protein, 58 kDa                               | 56.5       | 217         | 24               | gi 8393322       |
| 9      | Stress-70 protein, mitochondrial precursor                      | 73.8       | 178         | 19               | gi 55584140      |
|        | <b>Fatty Acid Metabolism</b>                                    |            |             |                  |                  |
| 10     | Enoyl-CoA hydratase 1, peroxisomal                              | 36.1       | 89          | 7                | gi 38566122      |
| 11     | Acetyl-CoA dehydrogenase, long-chain                            | 47.8       | 141         | 13               | gi 38541337      |
| 12     | Acetyl-CoA dehydrogenase, long-chain                            | 47.8       | 82          | 10               | gi 38541337      |
| 13     | Chain F, Enoyl-CoA hydratase in complex with hexadienoyl-CoA    | 28.2       | 94          | 6                | gi 24159086      |
| 14     | Chain B, Acyl-CoA dehydrogenase in complex with acetoacetyl-CoA | 42.1       | 92          | 9                | gi 20150495      |
| 15     | Carnitine palmitoyltransferase 2                                | 74.1       | 128         | 10               | gi 6978705       |
| 16     | Chain F, Enoyl-CoA hydratase in complex with hexadienoyl-CoA    | 28.2       | 90          | 7                | gi 24159086      |
| 17     | Electron transfer flavoprotein $\alpha$                         | 34.9       | 158         | 14               | gi 57527204      |
| 18     | Acetyl-CoA dehydrogenase, medium chain                          | 46.5       | 119         | 11               | gi 8392833       |
| 19     | Electron transfer flavoprotein $\beta$                          | 27.7       | 85          | 5                | gi 51259425      |
| 20     | Acetyl-CoA dehydrogenase, medium chain                          | 46.5       | 140         | 12               | gi 8392833       |
| 21     | L-3-Hydroxyacyl-CoA dehydrogenase                               | 34.4       | 104         | 14               | gi 17105336      |
| 22     | Acetyl-CoA acyltransferase 2                                    | 41.9       | 208         | 18               | gi 55544         |
| 23     | Hadh protein (trifunctional protein)                            | 82.6       | 127         | 13               | gi 60688124      |
|        | <b>Ligases</b>                                                  |            |             |                  |                  |
| 24     | Suclg2 protein                                                  | 46.5       | 97          | 8                | gi 71681082      |

|    |                                                                      |       |     |    |              |
|----|----------------------------------------------------------------------|-------|-----|----|--------------|
| 25 | Suclg2 protein                                                       | 46.5  | 171 | 16 | gi 71681082  |
| 26 | Unidentified                                                         | *     |     |    |              |
| 27 | Propionyl-CoA carboxylase alpha chain, mitochondrial precursor       | 77.7  | 91  | 13 | gi 109502895 |
| 28 | Carbamoyl phosphate synthetase 1, mitochondrial                      | 164.5 | 189 | 21 | gi 8393186   |
| 29 | Carbamoyl phosphate synthetase 1, mitochondrial                      | 164.5 | 266 | 36 | gi 8393186   |
| 30 | Pyruvate carboxylase                                                 | 129.7 | 207 | 27 | gi 55716041  |
| 31 | Carbamoyl phosphate synthetase 1, mitochondrial                      | 164.5 | 321 | 44 | gi 8393186   |
| 32 | Carbamoyl phosphate synthetase 1, mitochondrial                      | 164.5 | 312 | 39 | gi 8393186   |
|    | <b>Oxidative Phosphorylation</b>                                     |       |     |    |              |
| 33 | Ubiquinol-cytochrome c reductase core protein I                      | 52.8  | 109 | 7  | gi 51259340  |
| 34 | ATP synthase, H <sup>+</sup> transporting F1 complex $\beta$ subunit | 56.4  | 163 | 17 | gi 1374715   |
| 35 | ATP synthase, H <sup>+</sup> transporting F1 complex $\beta$ subunit | 56.4  | 191 | 17 | gi 1374715   |
| 36 | Adenylate kinase 2, isoform b                                        | 25.5  | 101 | 8  | gi 38511598  |
| 37 | Chain A, Rat Liver F1-ATPase                                         | 55.3  | 148 | 14 | gi 6729934   |
| 38 | Chain A, Rat Liver F1-ATPase                                         | 55.3  | 199 | 18 | gi 6729934   |
| 39 | Ubiquinol-cytochrome c reductase, Rieske iron-sulfur polypeptide 1   | 29.3  | 75  | 5  | gi 18044191  |
|    | <b>Oxidoreductases</b>                                               |       |     |    |              |
| 40 | Pyruvate dehydrogenase $\beta$ subunit                               | 39.0  | 106 | 7  | gi 50925725  |
| 41 | Mitochondrial aldehyde dehydrogenase                                 | 56.4  | 171 | 11 | gi 25990263  |
| 42 | Mitochondrial aldehyde dehydrogenase                                 | 56.4  | 205 | 16 | gi 25990263  |
| 43 | Sarcosine dehydrogenase                                              | 101.4 | 227 | 21 | gi 25742657  |
| 44 | 3-Hydroxyisobutyrate dehydrogenase                                   | 35.3  | 128 | 9  | gi 83977457  |
| 45 | Isovaleryl CoA dehydrogenase                                         | 46.4  | 128 | 10 | gi 6981112   |
| 46 | Aldehyde dehydrogenase 1 family, member B1                           | 57.6  | 102 | 10 | gi 58865518  |
| 47 | Dimethylglycine dehydrogenase                                        | 96.0  | 185 | 17 | gi 2498527   |
| 48 | Alcohol dehydrogenase, iron containing, 1                            | 50.2  | 84  | 8  | gi 67678029  |
| 49 | Dihydrolipoamide dehydrogenase                                       | 54.0  | 143 | 10 | gi 38303871  |
| 50 | Glutamate dehydrogenase 1, mitochondrial precursor (GDH) isoform 2   | 61.4  | 144 | 15 | gi 6980956   |
| 51 | Dihydrolipoamide dehydrogenase                                       | 54.0  | 130 | 13 | gi 38303871  |

|    |                                                                     |      |     |    |              |
|----|---------------------------------------------------------------------|------|-----|----|--------------|
| 52 | Glutamate dehydrogenase 1, mitochondrial precursor (GDH) isoform 2  | 61.4 | 83  | 10 | gi 6980956   |
| 53 | Aldehyde dehydrogenase family 6, subfamily A1                       | 57.8 | 158 | 14 | gi 13591997  |
| 54 | Aldehyde dehydrogenase family 6, subfamily A1                       | 57.8 | 107 | 8  | gi 13591997  |
| 55 | Chain D, 3-Hydroxyacyl-CoA deHase Binary Complex (NADH & Estradiol) | 27.2 | 103 | 8  | gi 14488727  |
| 56 | 3-Hydroxybutyrate dehydrogenase, type 1                             | 38.2 | 83  | 7  | gi 55250770  |
| 57 | Malate dehydrogenase, mitochondrial precursor                       | 35.6 | 216 | 16 | gi 38648863  |
|    | <b>Transferases</b>                                                 |      |     |    |              |
| 58 | 3-Mercaptopyruvate sulfurtransferase                                | 32.9 | 104 | 7  | gi 55824737  |
| 59 | Ornithine carbamoyltransferase                                      | 39.9 | 136 | 10 | gi 205886    |
| 60 | Thiosulfate sulfurtransferase                                       | 33.4 | 88  | 6  | gi 57528682  |
| 61 | Serine hydroxymethyl transferase 2 (mitochondrial)                  | 55.7 | 98  | 14 | gi 55154499  |
| 62 | Thiosulfate sulfurtransferase                                       | 33.4 | 81  | 6  | gi 57528682  |
| 63 | Thiosulfate sulfurtransferase                                       | 33.4 | 93  | 8  | gi 57528682  |
| 64 | 3-Hydroxy-3-methylglutaryl-CoA synthase 2                           | 56.9 | 113 | 14 | gi 27465521  |
| 65 | Acetyl-CoA acetyltransferase 1                                      | 44.7 | 95  | 7  | gi 8392836   |
| 66 | Acetyl-CoA acetyltransferase 1                                      | 44.7 | 74  | 6  | gi 8392836   |
| 67 | Glutamate oxaloacetate transaminase 2                               | 47.3 | 98  | 8  | gi 38197424  |
| 68 | Aspartate aminotransferase, mitochondrial precursor                 | 47.4 | 87  | 7  | gi 192050    |
|    | <b>Alternate Activities</b>                                         |      |     |    |              |
| 69 | Choline dehydrogenase                                               | 66.2 | 169 | 17 | gi 34419913  |
| 70 | Agmatinase                                                          | 37.8 | 73  | 6  | gi 60688189  |
| 71 | Alpha-Methylacyl-CoA racemase                                       | 41.8 | 97  | 8  | gi 6981184   |
| 72 | Catalase                                                            | 59.7 | 234 | 24 | gi 51980301  |
| 73 | Tu translation elongation factor, mitochondrial                     | 49.5 | 127 | 10 | gi 109462848 |
| 74 | Tu translation elongation factor, mitochondrial                     | 49.5 | 89  | 8  | gi 109462848 |
| 75 | Actin, cytoplasmic 2                                                | 41.8 | 154 | 10 | gi 109507063 |
| 76 | Catalase                                                            | 59.7 | 163 | 23 | gi 51980301  |
|    | Aldehyde dehydrogenase 4 family, member A1                          | 61.7 | 163 |    | gi 109475727 |

38 Mitochondrial proteins listed above were matched on all gels from the control, ethanol, control + SAM, and ethanol +  
 39 SAM. These samples were broadly categorized into functional classes. Spot # is the same as those used to identify  
 40 protein spots in the following location map. Mass is measured in kDa. MOWSE is an algorithmic calculation used to  
 41 assign a statistical weight to each peptide match; therefore, the higher MOWSE score implies higher statistical likelihood  
 42 of the match being correct. Accession number is the unique NCBI label given to proteins. Matched proteins are the  
 43 number of peptides that were matched to allow for protein designation and MOWSE calculation.

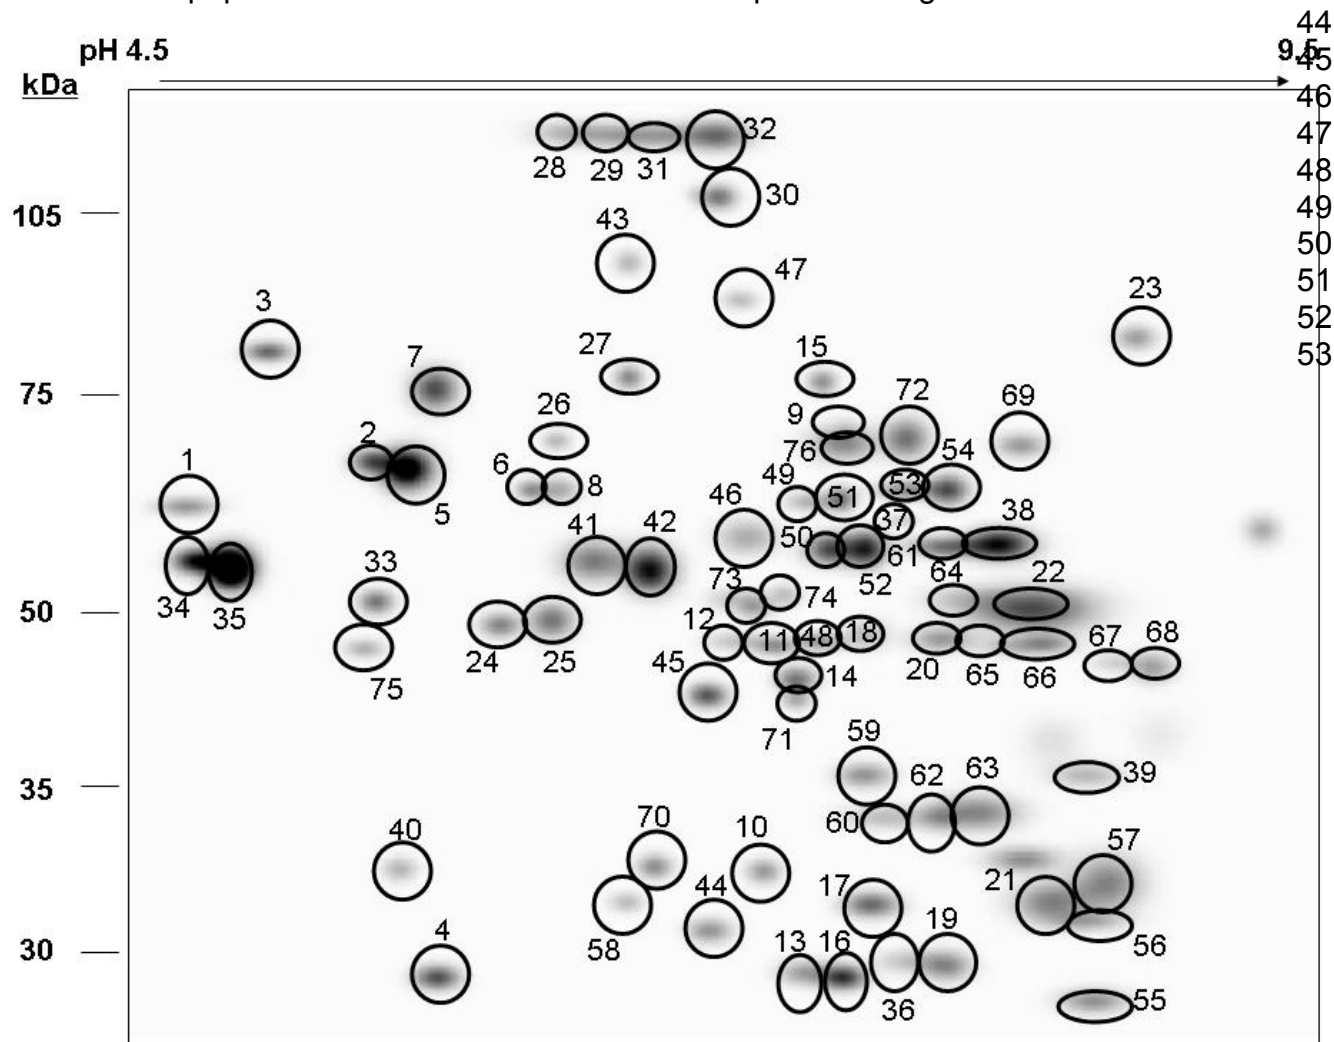

44  
45  
46  
47  
48  
49  
50  
51  
52  
53  
**Figure 2. Master map of all proteins identified by mass spectrometry techniques.** See supplemental Table 1 for protein ID's.

54 **Supplemental Table 2. Supplemental table listing all matched proteins from 2D BN Page gels.**

| Spot # | Spot Designation                                                       | Mass (kDa) | MOWSE Score | Matched Peptides | Accession Number |
|--------|------------------------------------------------------------------------|------------|-------------|------------------|------------------|
| 1      | Propionyl-CoA carboxylase $\alpha$ chain                               | 79.8       | 272         | 37               | gi66773933       |
|        | NADH dehydrogenase Fe-S Protein 1                                      | 79.7       | 272         | 37               | gi74147040       |
| 2      | NADH dehydrogenase flavoprotein 1                                      | 50.8       | 176         | 27               | gi19526814       |
|        | ATP synthase, H <sup>+</sup> transporting F1 complex $\beta$ subunit   | 56.3       | 176         | 27               | gi89574015       |
| 3      | NADH dehydrogenase Fe-S protein 2                                      | 53.3       | 171         | 19               | gi23346461       |
| 4      | NADH dehydrogenase 1 $\alpha$ subcomplex 10                            | 40.6       | 160         | 12               | gi26337977       |
| 5      | NADH dehydrogenase flavoprotein 2                                      | 27.3       | 80          | 7                | gi110625954      |
| 6      | NADH dehydrogenase 1 $\alpha$ subcomplex 8                             | 20.0       | 102         | 7                | gi21312012       |
| 7      | NADH dehydrogenase 1 $\alpha$ subcomplex subunit 12                    | 17.1       | 108         | 9                | gi47117166       |
| 8      | NADH dehydrogenase 1 $\beta$ subcomplex 4                              | 15.1       | 94          | 7                | gi21314826       |
| 9      | NADH dehydrogenase Fe-S protein 6                                      | 13.0       | 105         | 7                | gi56711244       |
| 10     | ATP synthase, H <sup>+</sup> transporting F1 complex $\alpha$ subunit  | 59.7       | 167         | 25               | gi6680748        |
|        | ATP synthase H <sup>+</sup> transporting F1 complex $\beta$ subunit    | 56.3       | 167         | 25               | gi74198645       |
| 11     | ATP synthase $\gamma$ chain                                            | 32.9       | 106         | 8                | gi21263432       |
| 12     | ATP synthase H <sup>+</sup> transporting F0 complex subunit b isoform1 | 28.9       | 189         | 11               | gi78214312       |
| 13     | ATP synthase H <sup>+</sup> transporting F0 complex subunit d          | 18.7       | 102         | 8                | gi21313679       |
| 14     | Cytochrome c oxidase subunit IV isoform1                               | 19.5       | 74          | 7                | gi6753498        |
| 15     | ATP synthase H <sup>+</sup> transporting F0 complex subunit g          | 11.4       | 81          | 7                | gi31980744       |
| 16     | Mitochondrial trifunctional protein $\alpha$ subunit                   | 82.6       | 93          | 17               | gi33859811       |
| 17     | 60 kDa heat shock protein, mitochondrial                               | 61.0       | 99          | 13               | gi129378         |
| 18     | Ubiquinol-cytochrome c reductase, complex core protein 1               | 52.7       | 94          | 12               | gi14548301       |
| 19     | Ubiquinol-cytochrome c reductase, core protein 2                       | 48.2       | 98          | 10               | gi22267442       |
| 20     | Cytochrome c1                                                          | 35.3       | 114         | 8                | gi74213069       |
| 21     | Ubiquinol-cytochrome c reductase, Rieske Fe-S polypeptide 1            | 29.3       | 86          | 6                | gi13385168       |
| 22     | Ubiquinol-cytochrome c reductase, subunit 7 (14 kDa)                   | 13.5       | 104         | 9                | gi17380333       |
| 23     | Ubiquinol-cytochrome c reductase, subunit 8                            | 9.8        | 84          | 5                | gi21539585       |
| 24     | Ubiquinol-cytochrome c reductase, subunit protein 9                    | 7.4        | 89          | 4                | gi37574048       |
| 25     | 2-Hydroxyacyl-CoA lyase                                                | 63.6       | 96          | 18               | gi31560355       |
| 26     | Electron transferring flavoprotein $\beta$ polypeptide                 | 27.6       | 154         | 12               | gi12832367       |

|    |                                            |      |     |    |            |
|----|--------------------------------------------|------|-----|----|------------|
| 27 | Cytochrome c oxidase, subunit II           | 25.8 | 90  | 10 | gi1706015  |
| 28 | Unidentified                               | *    |     |    |            |
| 29 | Cytochrome c oxidase, subunit IV isoform 1 | 19.5 | 140 | 13 | gi6753498  |
| 30 | Cytochrome c oxidase, subunit VA           | 16.0 | 95  | 6  | gi117099   |
| 31 | Cytochrome c oxidase, subunit VIa          | 12.3 | 88  | 5  | gi1352173  |
| 32 | Cytochrome c oxidase, subunit VIb          | 10.1 | 97  | 6  | gi13385090 |
| 33 | Unidentified                               | *    |     |    |            |

55 Mitochondrial proteins listed above were matched on all gels from the control, ethanol, control + SAM, and ethanol +  
56 SAM. These samples were categorized to the location on the gel in relation to OxPhos complexes. Spot # is the same as  
57 those used to identify protein spots in Figure 6A. Mass is measured in kDa. MOWSE is an algorithmic calculation used to  
58 assign a statistical weight to each peptide match; therefore, the higher MOWSE score implies higher statistical likelihood  
59 of the match being correct. Accession number is the unique NCBI label given to proteins. Matched proteins are the  
60 number of peptides that were matched to allow for protein designation and MOWSE calculation.

61 \*Unidentified proteins
